# Supplementary material
Source: PubMed Central journal article supplement (PMC4051254)
Supplement: mp500005v_si_001.pdf [file mp500005v_si_001.pdf]

## SUPPORTING INFORMATION

**Table S1.** Parameters obtained from the correlation of  $t = 0$  ssHDX-MS and FTIR results with the percent loss Mb at  $t = 180$  days.

**Figure S1:** Amino acid sequence of Mb showing secondary structure elements with cylinders representing the  $\alpha$ -helices. Solid lines indicate the 13 pepsin digest fragments analyzed in this study with a total sequence coverage of 100% .

**Figure S2:** Kinetics of deuterium uptake for the pepsin digest fragments from MbA (closed circle), MbB (closed triangle), MbC (open circle), MbD (open square) and MbE (closed square). Plots of the time course of deuterium exchange were fitted to an equation for two phase exponential association (Graph Pad Prism software version 5 (San Diego, CA)) ( $n = 3, \pm SE$ ).

**Figure S3:** Peak width broadening at 20% peak height for 8 non redundant pepsin digest fragments from Mb in MbA (closed circle), MbB (closed triangle), MbC (open circle), MbD (open square) and MbE (closed square) ( $n = 3, \pm SE$ ).

**Figure S4:** Peak width against percentage deuterium uptake for 8 non redundant pepsin digest fragments from Mb in MbA (closed circle), MbB (closed triangle), MbC (open circle), MbD (open square), MbE (closed square); (X) represents the peak width for undeuterated peptides ( $n = 3, \pm SE$ ).

**Figure S5:** Comparison of the Z-average diameter values for prelyophilized and lyophilized Mb samples.

**Figure S6:** Correlation of Mb aggregation during long-term storage (at  $t = 180$  days) with  $t = 0$  ssHDX-MS (A) and FTIR (B) analysis. The percent loss of Mb monomer after 180 days of

storage at 25 °C and 40 °C as a function of percent deuterium uptake (**A1** and **A2**),  $N_{\text{fast}}/(N_{\text{fast}} + N_{\text{slow}})$  (**A3** and **A4**), band intensity for  $\alpha$ -helix (**B1** and **B2**) and band position for  $\alpha$ -helix (**B3** and **B4**) in formulations, MbA (closed circle), MbB (closed triangle), MbC (open circle), MbD (open square) and MbE (closed square) ( $n = 3, \pm \text{SE}$ ). The data were subjected to linear regression to obtain slope, intercept and  $R^2$  values (see Table S1).

## TABLES

**Table S1.** Parameters obtained from the correlation of  $t = 0$  ssHDX-MS and FTIR results with the percent loss Mb at  $t = 180$  days.

| Figure No. <sup>a</sup> | Parameters <sup>b</sup> |                       | R <sup>2</sup> |
|-------------------------|-------------------------|-----------------------|----------------|
|                         | Slope                   | Intercept             |                |
| S6A1                    | $0.31 \pm 0.08$         | $-1.73 \pm 1.95$      | 0.8415         |
| S6A2                    | $0.79 \pm 0.16$         | $-4.84 \pm 4.02$      | 0.8912         |
| S6A3                    | $-31.26 \pm 6.06$       | $25.19 \pm 3.95$      | 0.8985         |
| S6A4                    | $-81.53 \pm 5.13$       | $65.02 \pm 3.34$      | 0.9883         |
| S6B1                    | $1735.32 \pm 1096.97$   | $19.73 \pm 9.34$      | 0.4549         |
| S6B2                    | $5153.19 \pm 2189.41$   | $56.04 \pm 18.64$     | 0.6487         |
| S6B3                    | $-1.46 \pm 1.62$        | $2381.54 \pm 2686.38$ | 0.2036         |
| S6B4                    | $-5.27 \pm 3.40$        | $8721.92 \pm 5628.01$ | 0.4393         |

<sup>a</sup> Refer Figure S6 for storage conditions and variables used.

<sup>b</sup> Parameters  $\pm$  SE determined by linear fit of values obtained from FTIR and HDX-MS experiments at  $t=0$  against Mb aggregation at  $t=180$  days .

## FIGURES

Figure S1

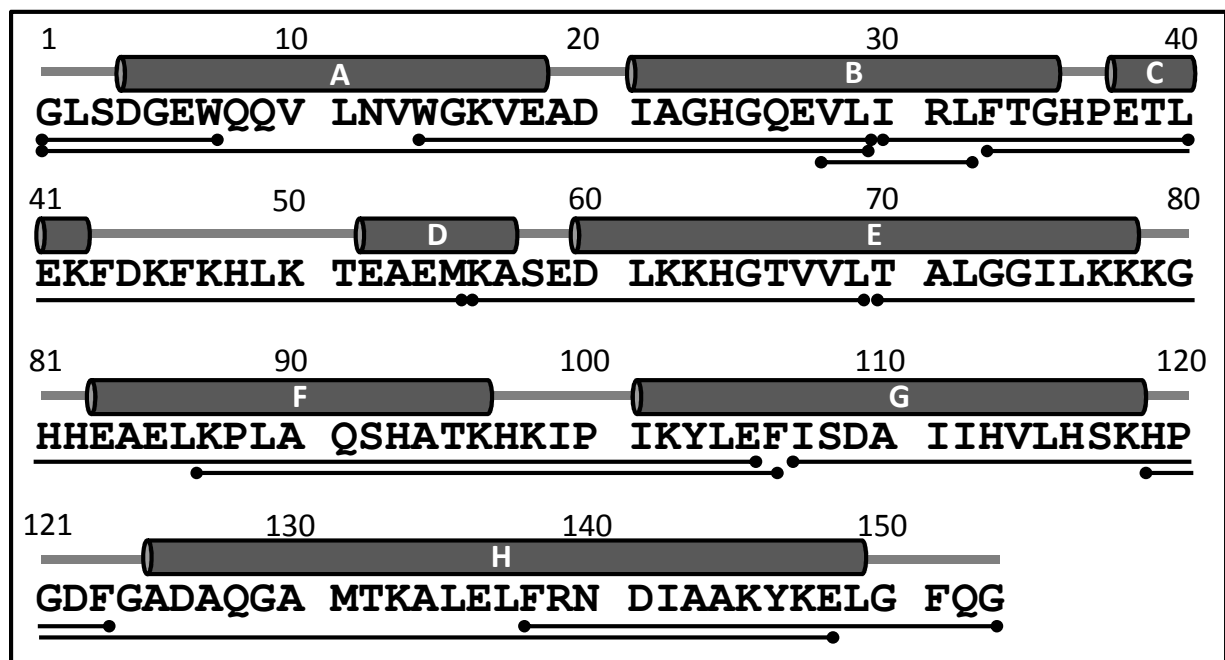

**Figure S1:** Amino acid sequence of Mb showing secondary structure elements with cylinders representing the  $\alpha$ -helices. Solid lines indicate the 13 pepsin digest fragments analyzed in this study with a total sequence coverage of 100% .

Figure S2

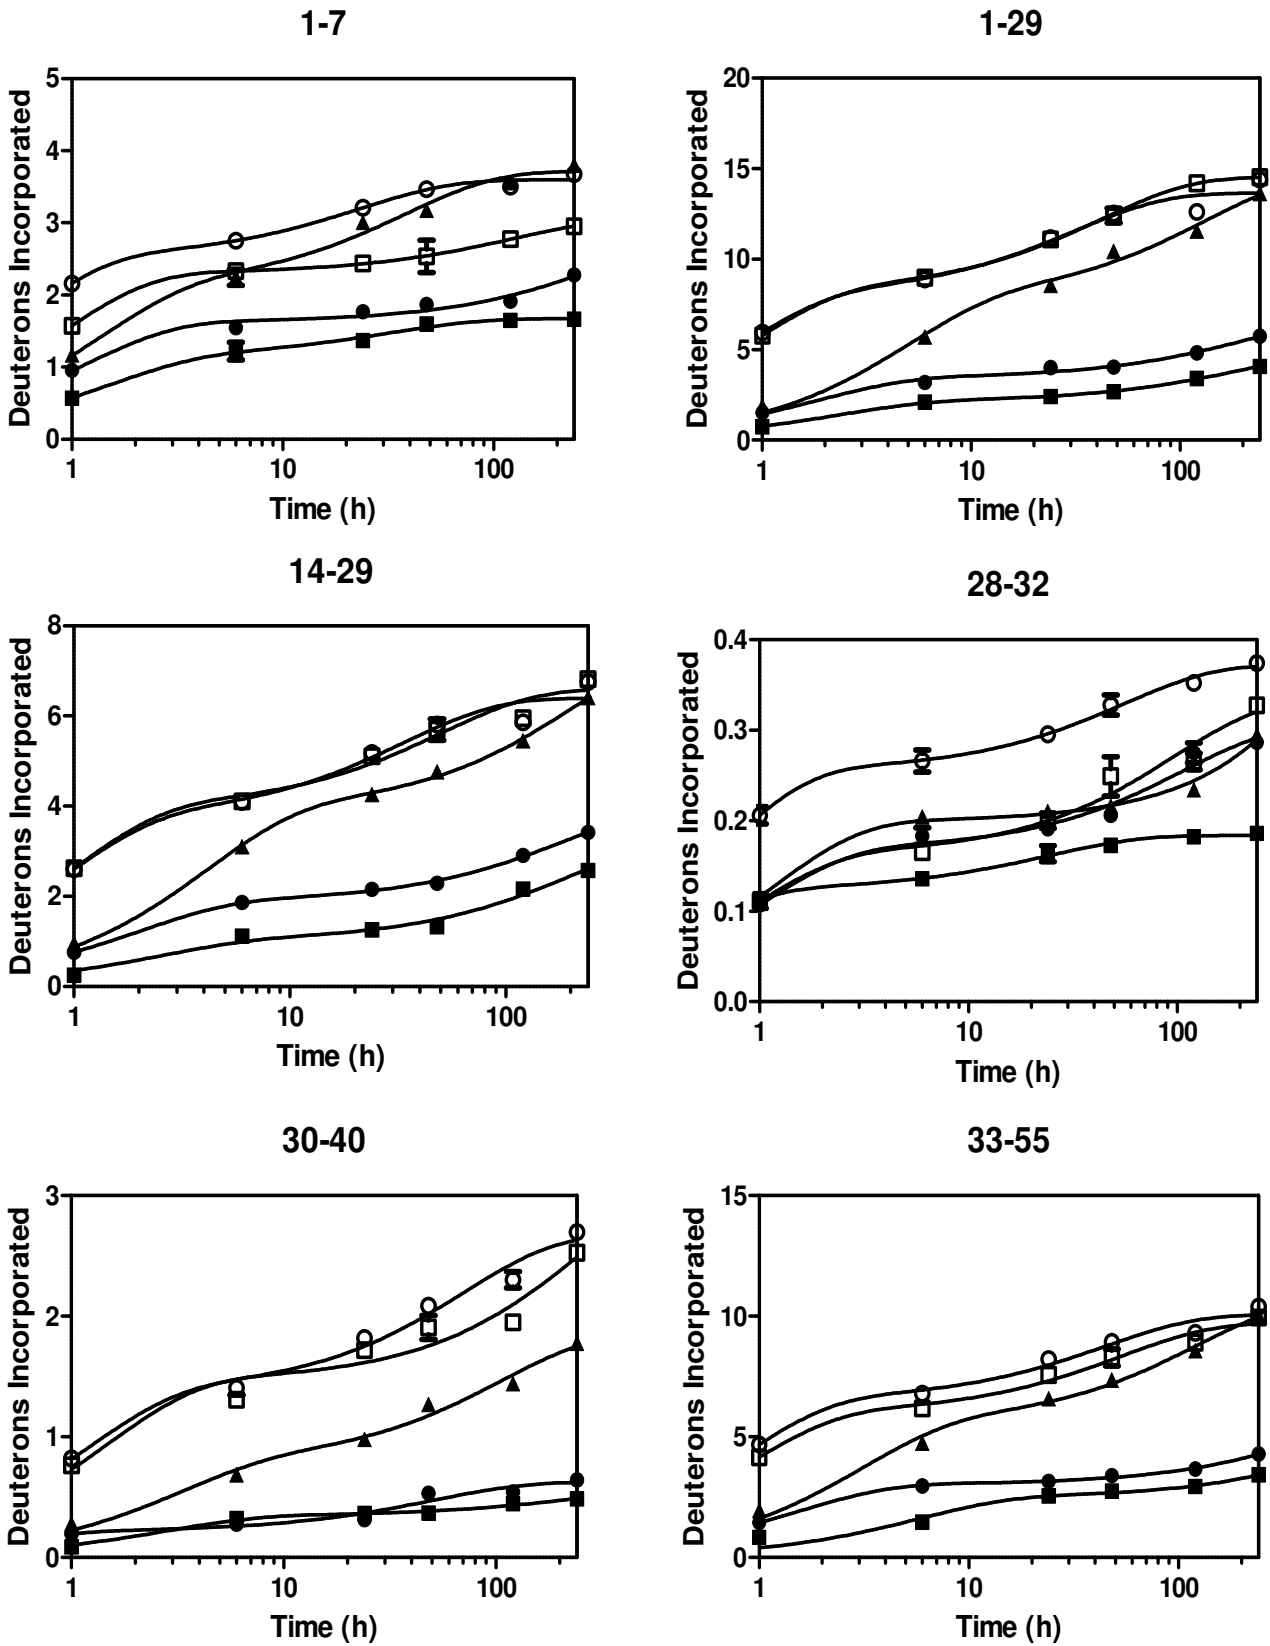

56-69

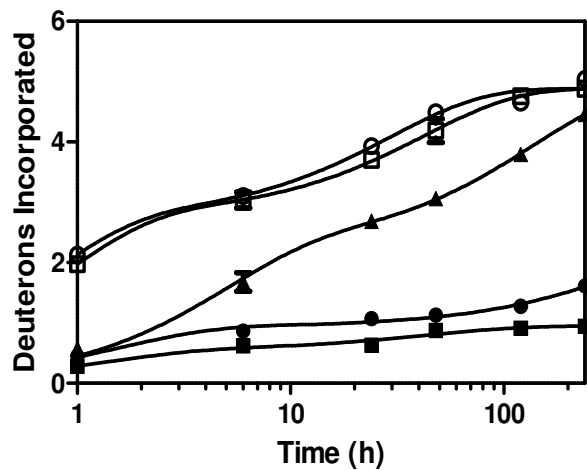

70-105

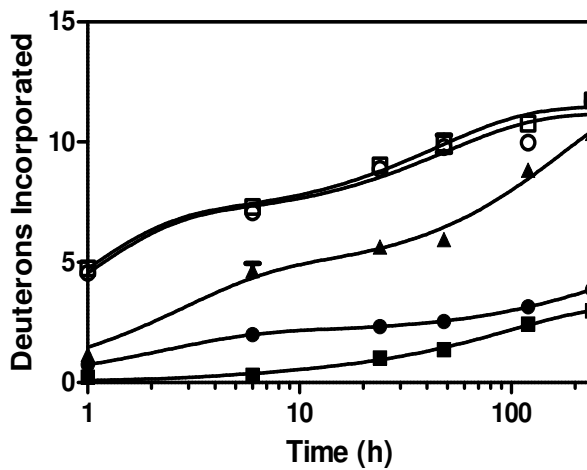

87-106

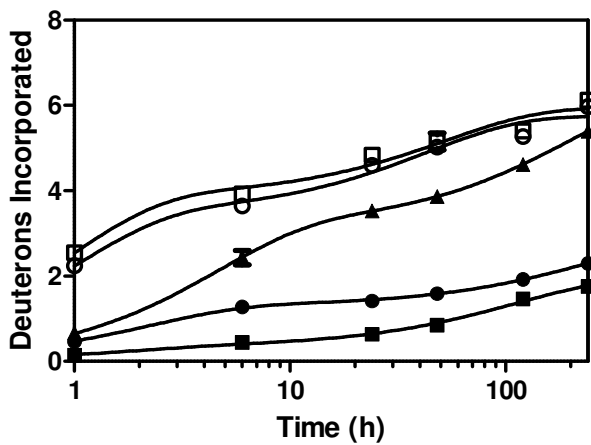

106-137

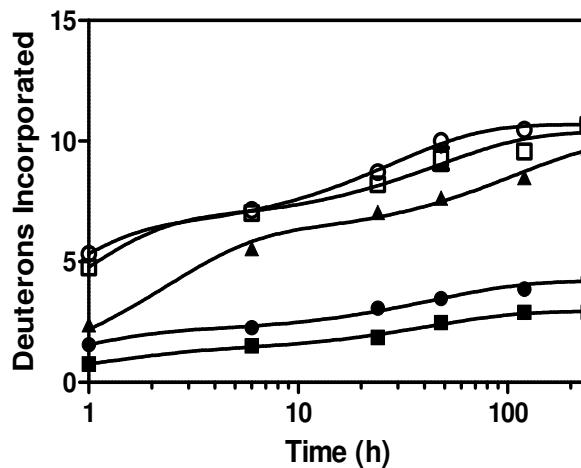

107-123

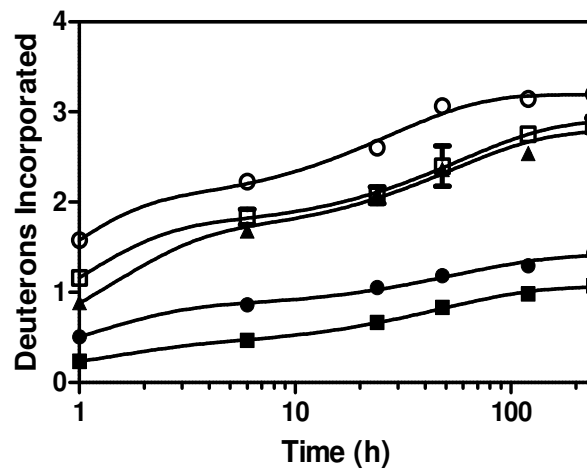

119-148

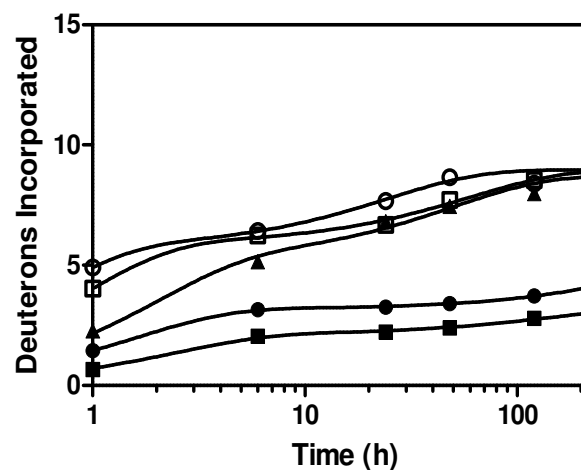

138-153

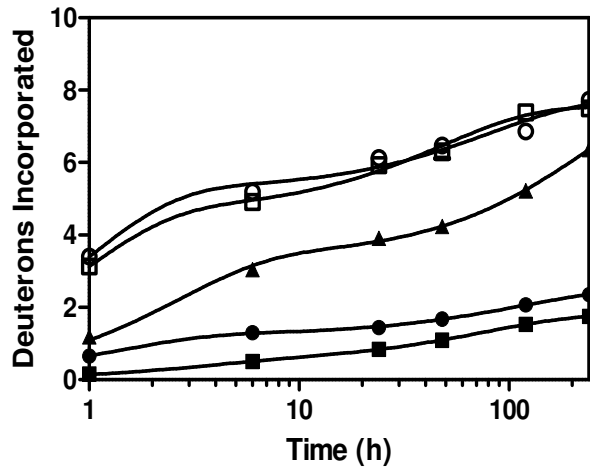

**Figure S2:** Kinetics of deuterium uptake for the pepsin digest fragments from MbA (closed circle), MbB (closed triangle), MbC (open circle), MbD (open square) and MbE (closed square). Plots of the time course of deuterium exchange were fitted to an equation for two phase exponential association (Graph Pad Prism software version 5 (San Diego, CA)) ( $n = 3, \pm SE$ ).

Figure S3

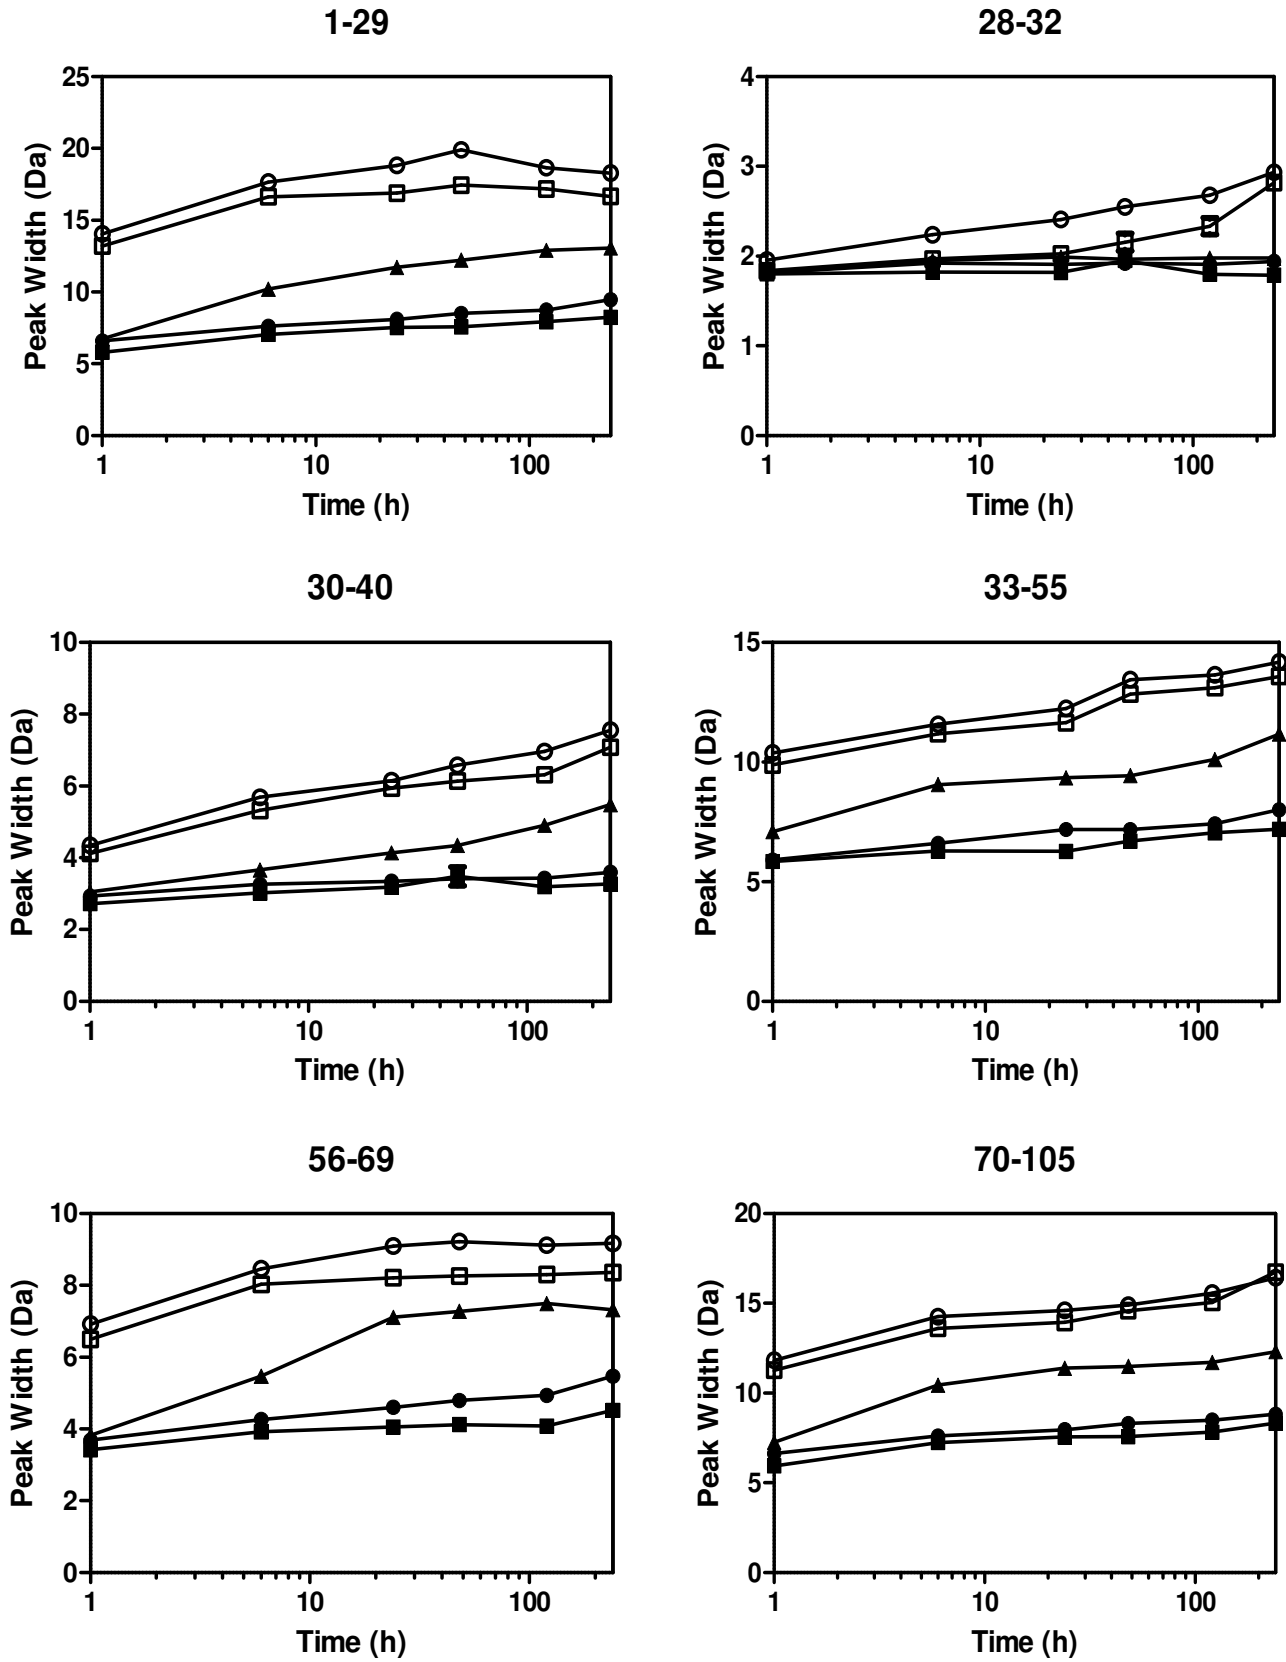



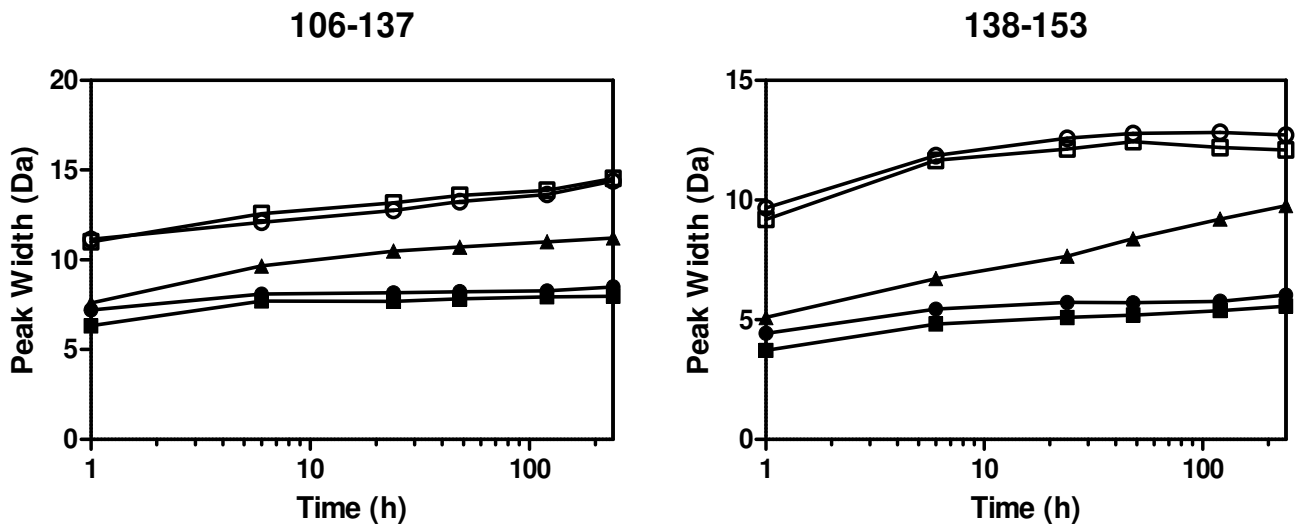

**Figure S3:** Peak width broadening at 20% peak height for 8 non redundant pepsin digest fragments from Mb in MbA (closed circle), MbB (closed triangle), MbC (open circle), MbD (open square) and MbE (closed square) (n = 3,  $\pm$  SE).

**Figure S4**

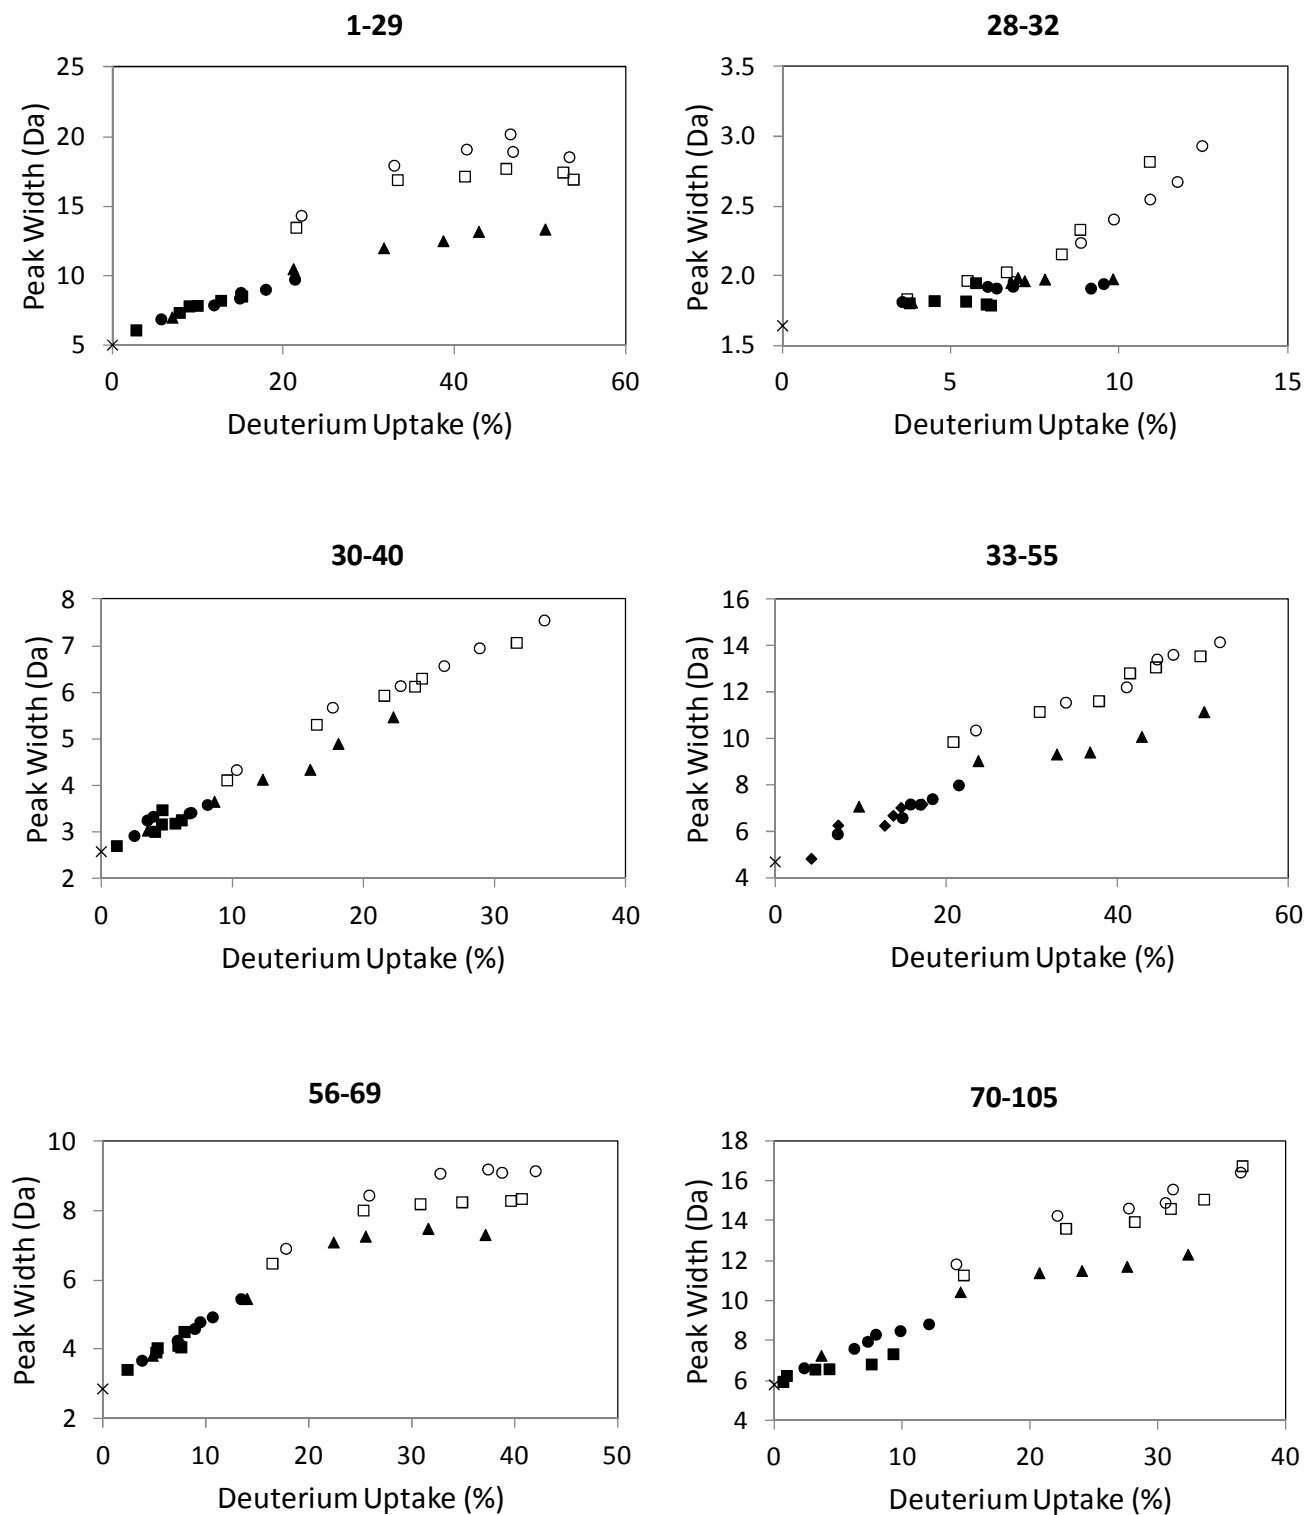

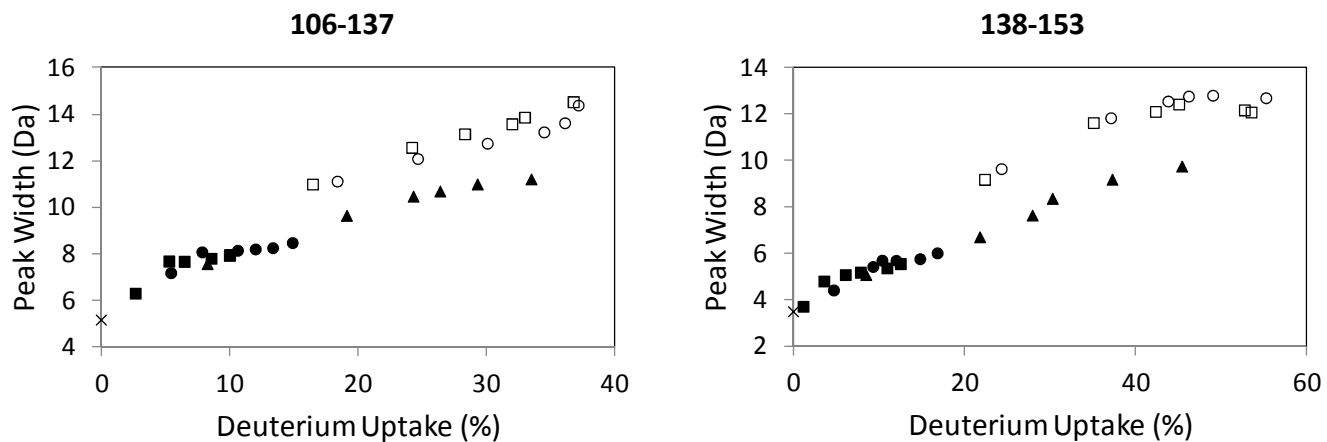

**Figure S4:** Peak width against percentage deuterium uptake for 8 non redundant pepsin digest fragments from Mb in MbA (closed circle), MbB (closed triangle), MbC (open circle), MbD (open square), MbE (closed square); (X) represents the peak width for undeuterated peptides.

**Figure S5**

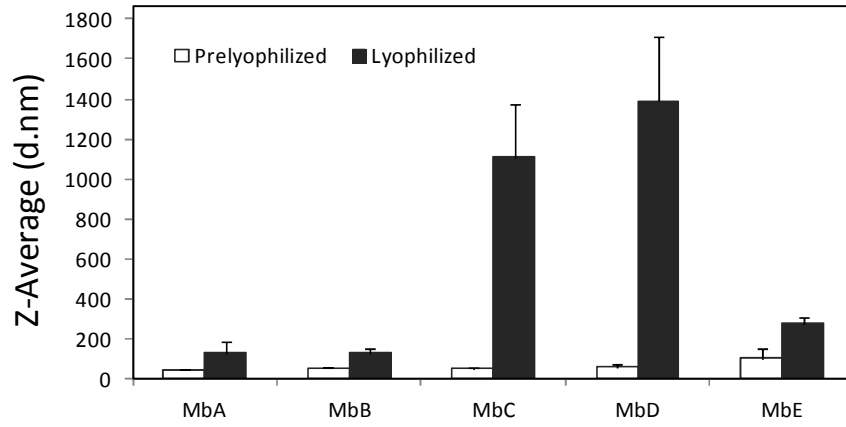

**Figure S5:** Comparison of the Z-average diameter values for prelyophilized and lyophilized Mb samples.

Figure S6

S6A

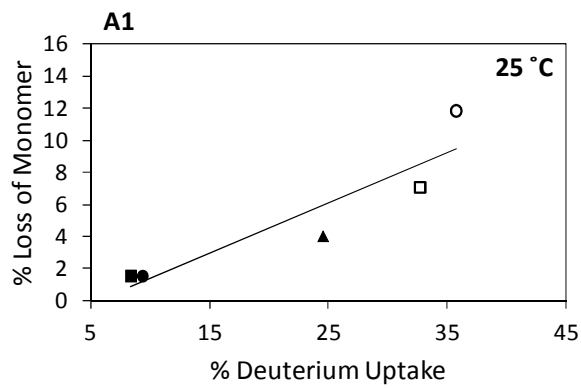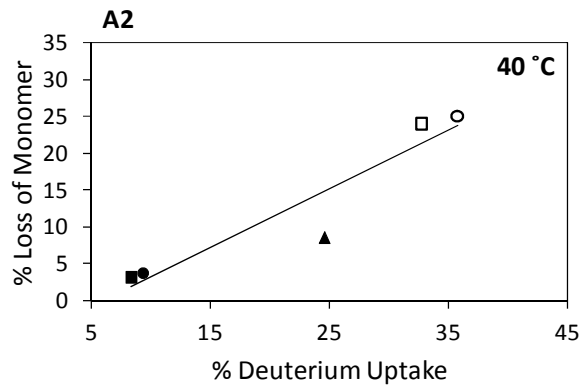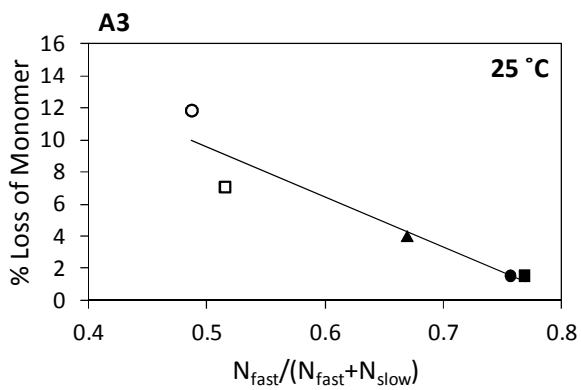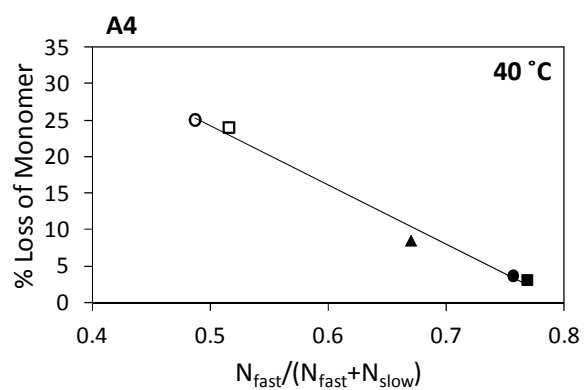

S6B

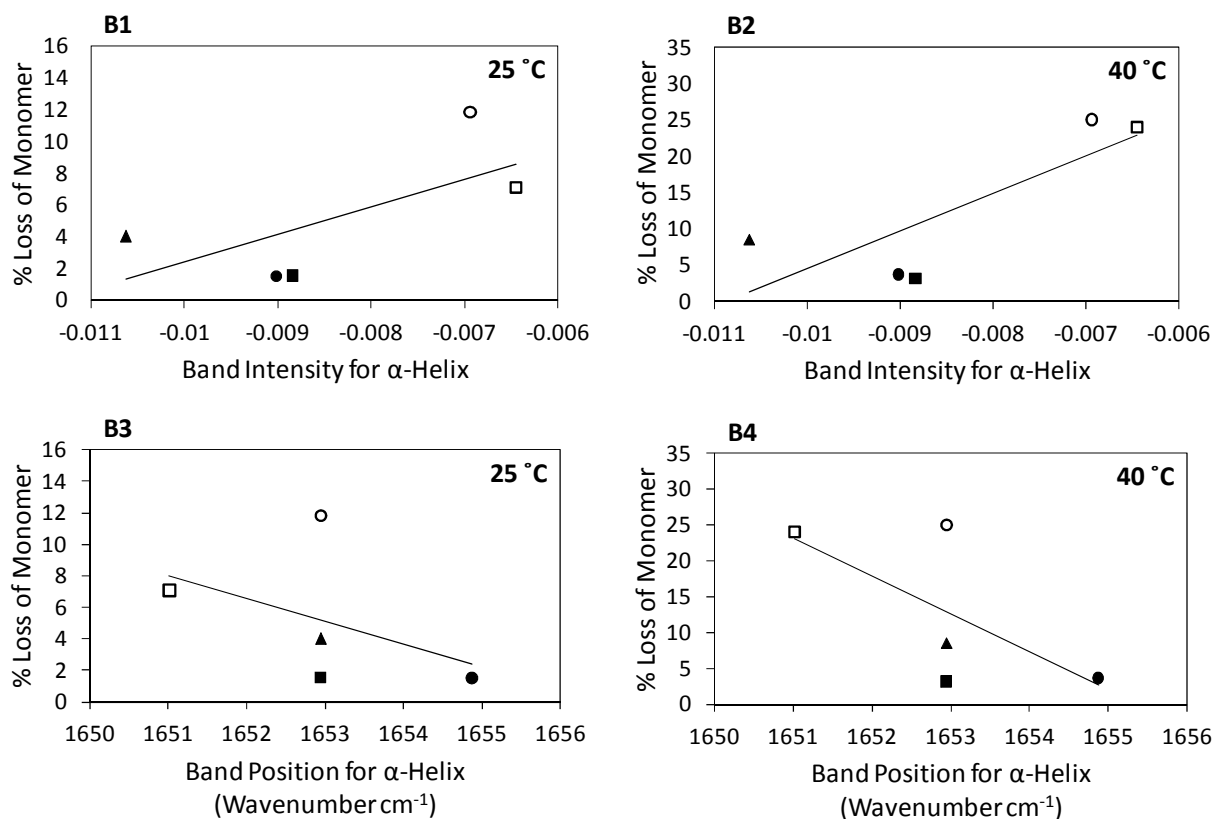

**Figure S6:** Correlation of Mb aggregation during long-term storage (at  $t = 180$  days) with  $t = 0$  ssHDX-MS (**A**) and FTIR (**B**) analysis. The percent loss of Mb monomer after 180 days of storage at 25 °C and 40 °C as a function of percent deuterium uptake (**A1** and **A2**),  $N_{fast}/(N_{fast} + N_{slow})$  (**A3** and **A4**), band intensity for  $\alpha$ -helix (**B1** and **B2**) and band position for  $\alpha$ -helix (**B3** and **B4**) in formulations, MbA (closed circle), MbB (closed triangle), MbC (open circle), MbD (open square) and MbE (closed square) ( $n = 3 \pm SE$ ). The data were subjected to linear regression to obtain slope, intercept and  $R^2$  values (see Table S1).
